# Supplementary material
Source: publisher figshare collection journal article supplement (https://frontiersin.figshare.com/ndownloader/files/22690781)
Supplement: Supplementary file [file 22690781]

## 1 Appendix: the derivation of spectral amplification factor and signal-to-noise ratio

2 According to the linear approximation theory, the output spike train of the Eq. (5) in the time domain has  
3 the form

$$4 \quad y_i(t) = y_i^0(t) + R(\bar{\mu}, D, t) * (f(t) - \langle f(t) \rangle_0) + s(t) \quad (A1)$$

5 where  $y_i^0(t)$  represents a realization of the spike train generated by the integrate-and-fire neuron obeying Eq.  
6 (A1) in the absence of the time-dependent perturbation,  $*$  denotes the convolution,  $\bar{\mu} = \mu + \langle f(t) \rangle_0$  is the base  
7 current,  $R(\bar{\mu}, D, t)$  is the base current and noise level-dependent linear response function, with Fourier  
8 transform called linear susceptibility to be explicitly given below, and  $\langle f(t) \rangle_0 = Gr(\bar{\mu}, D)$  is the stationary average  
9 of the feedback term with the stationary firing rate  $r(\bar{\mu}, D)$ , which can be found by solving the self-consistent  
10 relation [20,27,44]

$$11 \quad r(\bar{\mu}, D, V_T) = r_0(\bar{\mu} + Gr(\bar{\mu}, D), D, V_T) \quad (A2)$$

12 with  $r_0(\mu, D, V_T) = (\tau_R + \sqrt{\pi} \int_{(\mu-v_T)/\sqrt{2D}}^{(\mu-v_R)/\sqrt{2D}} dz e^{z^2} \operatorname{erfc}(z))^{-1}$ . Introducing Fourier transform of the zero average spike trains as

$$13 \quad \tilde{y}_i(\omega) = \frac{1}{\sqrt{T}} \int_0^T dt e^{i\omega t} (y_i(t) - r(\bar{\mu}, D)).$$

14 Then, from Eq. (A1), one can get the linear response in the frequency domain as follows:

$$15 \quad \tilde{y}_i(\omega) = \tilde{y}_i^0(\omega) + A(\omega, \bar{\mu}, D, V_T) [\tilde{s}(\omega) + \frac{G}{N} F(\omega) \sum_{j=1}^N \tilde{y}_j(\omega)] \quad (A3)$$

16 where  $\tilde{y}_i^0(\omega) = \mathcal{F}[y_i^0(t)]$  represents a realization of the spiking output of the  $i$ th neuron in the frequency  
17 domain,  $F(\omega) = e^{i\omega\tau_D} / (1 - i\omega\tau_S)^2$  is the Fourier transform of the kernel in Eq. (2), and correspondingly  
18  $\frac{1}{N} F(\omega) \sum_{j=1}^N \tilde{y}_j(\omega)$  stands for the Fourier transform of the zero static mean synaptic feedback  $f(t) - \langle f(t) \rangle_0$ , and  
19  $A(\omega, \mu, D) = \mathcal{F}[R(\bar{\mu}, D, t)]$  is the linear susceptibility given by [27]

$$20 \quad A(\omega, \mu, D, V_T) = \frac{r(\mu, D) i \omega}{\sqrt{D} (i \omega - 1)} \frac{\tilde{D}_{i\omega-1}(\frac{\mu-v_T}{\sqrt{D}}) - e^\gamma \tilde{D}_{i\omega-1}(\frac{\mu-v_R}{\sqrt{D}})}{\tilde{D}_{i\omega}(\frac{\mu-v_T}{\sqrt{D}}) - e^\gamma e^{i\omega\tau_R} \tilde{D}_{i\omega}(\frac{\mu-v_R}{\sqrt{D}})} \quad (A4)$$

21 with  $\gamma = [v_R^2 - v_T^2 + 2\mu(v_T - v_R)] / 4D$ . Let

$$22 \quad Y(\omega) = [\tilde{y}_1(\omega), \tilde{y}_2(\omega), \dots, \tilde{y}_N(\omega)]^T, \quad Y_0(\omega) = [\tilde{y}_1^0(\omega), \tilde{y}_2^0(\omega), \dots, \tilde{y}_N^0(\omega)]^T.$$

23 Rewrite Eq. (A3) as

$$24 \quad Y(\omega) = Y_0(\omega) + A(\omega, \bar{\mu}, D, V_T) \tilde{s}(\omega) \alpha + \frac{1}{N} GA(\omega, \bar{\mu}, D, V_T) F(\omega) \alpha \alpha^T Y(\omega) \quad (A5)$$

25 Then, by  $\langle Y_0(\omega) \tilde{s}^*(\omega) \alpha \rangle = 0$ ,

$$26 \quad \begin{aligned} \langle Y(\omega) Y^H(\omega) \rangle = & \left( I + \frac{1}{N} \frac{GA(\omega, \bar{\mu}, D, V_T) F(\omega) \alpha \alpha^T}{1 - GA(\omega, \bar{\mu}, D, V_T) F(\omega)} \right) \left( \langle Y_0(\omega) Y_0^H(\omega) \rangle + |A(\omega, \bar{\mu}, D, V_T)|^2 \langle \tilde{s}(\omega) \tilde{s}^*(\omega) \rangle \alpha \alpha^T \right) \\ & \times \left( I + \frac{1}{N} \frac{GA^*(\omega, \bar{\mu}, D, V_T) F^*(\omega) \alpha \alpha^T}{1 - GA^*(\omega, \bar{\mu}, D, V_T) F^*(\omega)} \right) \end{aligned}$$

27 where the superscripts  $H$  and  $*$  denote transpose conjugate and conjugate, respectively, and  $\alpha = [1, 1, \dots, 1]^T$  is  
28 a constant auxiliary vector.

29 Note that for a homogeneous network, the population activity  $y(t) = \frac{1}{N} \sum y_i(t)$  is of central importance.

30 From the definition of spectral density  $G_{yy}(\omega) = \frac{1}{N^2} \alpha^T \langle Y(\omega) Y^H(\omega) \rangle \alpha$ , one can obtain

$$31 \quad \begin{aligned} G_{yy}(\omega) = & \left( 1 + \frac{GA(\omega, \bar{\mu}, D, V_T) F(\omega)}{1 - GA(\omega, \bar{\mu}, D, V_T) F(\omega)} \right) \left( \frac{1}{N^2} \sum_{i=1}^N \sum_{j=1}^N \langle y_i^0(\omega) y_j^{0*}(\omega) \rangle + |A(\omega, \bar{\mu}, D, V_T)|^2 \langle \tilde{s}(\omega) \tilde{s}^*(\omega) \rangle \right) \left( 1 + \frac{GA^*(\omega, \bar{\mu}, D, V_T) F^*(\omega)}{1 - GA^*(\omega, \bar{\mu}, D, V_T) F^*(\omega)} \right) \\ = & \frac{|A(\omega, \bar{\mu}, D, V_T)|^2 \langle \tilde{s}(\omega) \tilde{s}^*(\omega) \rangle + \frac{1}{N} S_0(\omega, \bar{\mu}, D, V_T)}{|1 - GA(\omega, \bar{\mu}, D, V_T) F(\omega)|^2}. \end{aligned} \quad (A6)$$

32 Let  $S_1(\omega) = \frac{|A|^2}{|1 - GAF|^2} \langle \tilde{s} \tilde{s}^* \rangle$  be the spectral density of the signal component, and

$$33 \quad S_2(\omega) = \frac{1}{N|1 - GAF|^2} S_0(\omega, \bar{\mu}, D, V_T) \text{ with}$$

$$34 \quad S_0(\omega, \mu, D, V_T) \stackrel{\Delta}{=} \langle \tilde{y}_i^0(\omega) \tilde{y}_i^{0*}(\omega) \rangle = r(\mu, D) \frac{|\tilde{D}_{i\omega}(\frac{\mu - v_T}{\sqrt{D}})|^2 - e^{2\gamma} |\tilde{D}_{i\omega}(\frac{\mu - v_R}{\sqrt{D}})|^2}{|\tilde{D}_{i\omega}(\frac{\mu - v_T}{\sqrt{D}}) - e^{\gamma} e^{i\omega \tau_R} \tilde{D}_{i\omega}(\frac{\mu - v_R}{\sqrt{D}})|^2} \quad (A7)$$

35 representing spectral density of fluctuations, then  $G_{yy}(\omega) = S_1(\omega) + S_2(\omega)$ . With the spectral density  $G_{yy}(\omega)$   
36 available, the spectral amplification factor and signal-to-noise ratio can be obtained accordingly, as shown in  
37 Eqs.(6) and (7).
